# Supplementary material
Source: Springer Nature journal article supplement (https://www.springermedizin.de/resource/supplementary/12936_2013_2823_MOESM2_ESM.pdf/9544352)
Supplement: MOESM2 [file 9544352]

**Late 1990s**  
Early development begins in China and Vietnam

**2001**  
Guangzhou University commences Chinese development of DHA-PQP

**2003**  
Sigma-Tau and Italian MoH discuss how to strengthen Italy's contribution to malaria

**2005-2007**  
Clinical development programme in Asia and Africa

**2007-2009**  
API transfer from China to India

**2010-2011**  
Additional clinical and nonclinical studies completed

**2001**  
DHA PQP identified as top priority for at Shanghai meeting

**2004**  
Agreement signed between MMV, Sigma-Tau, Oxford University and Holleykin

**2007**  
Orphan designation granted by the European Commission

**2009**  
Sigma-Tau submits dossier to EMA for marketing authorisation

**2011**  
European Commission grants marketing authorisation

**2012**  
160,000+ packages of Eurartesim delivered to Cambodia to fight drug resistance
